# Supplementary material for: Real-world outcomes of chemo-antiangiogenesis versus chemo-immunotherapy combinations in EGFR-mutant advanced non-small cell lung cancer patients after failure of EGFR-TKI therapy
Source: PubMed Central journal article supplement — Transl Lung Cancer Res. 2021 Sep;10(9):3782–92. doi: 10.21037/tlcr-21-681 (PMC8512457; doi:10.21037/tlcr-21-681), 2021-09
Supplement: tlcr-10-09-3782-supplementary.pdf [file tlcr-10-09-3782-supplementary.pdf]

**Table S1** Univariate and multivariate analyses of clinical parameters for PFS of chemo-antiangiogenesis combinations after TKI resistance (n=100)

| Factors                                                                | Univariate analysis |               |         | Multivariate analysis |             |         |
|------------------------------------------------------------------------|---------------------|---------------|---------|-----------------------|-------------|---------|
|                                                                        | HR                  | 95% CI        | P value | HR                    | 95% CI      | P value |
| Age ( $\leq 58 / > 58$ years)                                          | 1.668               | 1.058–2.628   | 0.0215  | 1.428                 | 0.841–2.426 | 0.187   |
| Gender (male/female)                                                   | 0.6625              | 0.4216–1.041  | 0.0589  | 1.609                 | 0.921–2.811 | 0.095   |
| Smoking status (current or former/never)                               | 0.9485              | 0.5630–1.598  | 0.8431  |                       |             |         |
| EGFR subtypes (19Del/L858R)                                            | 0.8754              | 0.5227–1.466  | 0.6011  |                       |             |         |
| Median PFS of TKIs <sup>a</sup> ( $\leq 3.1 / > 3.1$ months)           | 2.178               | 1.008–4.706   | 0.0057  | 2.040                 | 0.947–4.395 | 0.069   |
| T790M status after TKIs resistance (positive/negative)                 | 1.459               | 0.7369–2.890  | 0.2022  |                       |             |         |
| PD-L1 status ( $\geq 1\% / < 1\%$ )                                    | 0.6667              | 0.0902–4.928  | 0.6419  |                       |             |         |
| Metastasis sites ( $\leq 1 / > 2$ )                                    | 0.9701              | 0.6182–1.522  | 0.8910  |                       |             |         |
| Lines of therapy ( $2 / \geq 3$ )                                      | 0.7471              | 0.4683–1.192  | 0.1870  |                       |             |         |
| Lymphocyte count <sup>a</sup> ( $\leq 2.00 / > 2.00 \times 10^9 / L$ ) | 2.135               | 1.138–4.008   | 0.0495  | 1.944                 | 0.647–5.846 | 0.237   |
| Neutrophil count <sup>a</sup> ( $\leq 6.99 / > 6.99 \times 10^9 / L$ ) | 0.4176              | 0.1442–1.210  | 0.0144  | 1.193                 | 0.418–3.406 | 0.742   |
| Monocyte count <sup>a</sup> ( $\leq 0.68 / > 0.68 \times 10^9 / L$ )   | 0.5632              | 0.2617–1.212  | 0.0602  | 0.738                 | 0.344–1.583 | 0.345   |
| Eosinophil count <sup>a</sup> ( $\leq 0.09 / > 0.09 \times 10^9 / L$ ) | 1.610               | 0.9405–2.755  | 0.0479  | 1.280                 | 0.731–2.243 | 0.388   |
| Basophil count <sup>a</sup> ( $\leq 0.03 / > 0.03 \times 10^9 / L$ )   | 1.255               | 0.7323–2.152  | 0.4217  |                       |             |         |
| Platelet count <sup>a</sup> ( $\leq 373 / > 373 \times 10^9 / L$ )     | 0.5752              | 0.2689–1.230  | 0.0698  | 0.334                 | 0.119–0.937 | 0.037   |
| NLR <sup>a</sup> ( $\leq 1.82 / > 1.82$ )                              | 0.5319              | 0.2625–1.078  | 0.1611  |                       |             |         |
| MLR <sup>a</sup> ( $\leq 0.26 / > 0.26$ )                              | 1.215               | 0.7322–2.016  | 0.4224  |                       |             |         |
| PLR <sup>a</sup> ( $\leq 124.35 / > 124.35$ )                          | 0.5449              | 0.3309–0.8975 | 0.0272  | 0.941                 | 0.453–1.955 | 0.871   |

<sup>a</sup>, the assessment of the optimal cutoff values were conducted by X-tile software. Abbreviations: EGFR, epidermal growth factor receptor; TKIs, tyrosine kinase inhibitors; PD-L1, programmed cell death ligand 1; PFS, progression-free survival; NLR, neutrophil-to-lymphocyte ratio; MLR, monocyte-to-lymphocyte ratio; PLR, platelet-to-lymphocyte ratio.

**Table S2** Univariate and multivariate analyses of clinical parameters for PFS of chemo-immunotherapy combinations after TKI resistance (n=44)

| Factors                                                                | Univariate analysis |              |         | Multivariate analysis |              |         |
|------------------------------------------------------------------------|---------------------|--------------|---------|-----------------------|--------------|---------|
|                                                                        | HR                  | 95% CI       | P value | HR                    | 95% CI       | P value |
| Age ( $\leq 63 / > 63$ years)                                          | 1.134               | 0.5077–2.534 | 0.7550  |                       |              |         |
| Gender (male/female)                                                   | 0.9730              | 0.4441–2.132 | 0.9442  |                       |              |         |
| Smoking status (current or former/never)                               | 0.7240              | 0.2475–2.118 | 0.5908  |                       |              |         |
| EGFR subtypes (19Del/L858R)                                            | 1.113               | 0.4857–2.549 | 0.7976  |                       |              |         |
| Median PFS of TKIs <sup>a</sup> ( $\leq 7.1 / > 7.1$ months)           | 1.504               | 0.6431–3.519 | 0.2833  |                       |              |         |
| T790M status after TKIs resistance (positive/negative)                 | 3.028               | 0.5750–15.94 | 0.0275  | 3.527                 | 0.690–18.026 | 0.130   |
| PD-L1 status ( $\geq 1\% / < 1\%$ )                                    | 0.5465              | 0.0567–5.266 | 0.6076  |                       |              |         |
| Metastasis sites ( $\leq 1 / > 2$ )                                    | 0.6718              | 0.2684–1.682 | 0.3360  |                       |              |         |
| Lines of therapy ( $2 / \geq 3$ )                                      | 0.5618              | 0.2329–1.355 | 0.1258  |                       |              |         |
| Lymphocyte count <sup>a</sup> ( $\leq 1.06 / > 1.06 \times 10^9 / L$ ) | 3.401               | 0.9345–12.38 | 0.0020  | 1.588                 | 0.292–8.651  | 0.593   |
| Neutrophil count <sup>a</sup> ( $\leq 6.06 / > 6.06 \times 10^9 / L$ ) | 0.4695              | 0.1696–1.300 | 0.0657  | 0.950                 | 0.238–3.793  | 0.943   |
| Monocyte count <sup>a</sup> ( $\leq 0.40 / > 0.40 \times 10^9 / L$ )   | 0.4886              | 0.2134–1.119 | 0.1324  |                       |              |         |
| Eosinophil count <sup>a</sup> ( $\leq 0.15 / > 0.15 \times 10^9 / L$ ) | 1.890               | 0.8496–4.203 | 0.0769  | 1.577                 | 0.505–4.925  | 0.433   |
| Basophil count <sup>a</sup> ( $\leq 0.01 / > 0.01 \times 10^9 / L$ )   | 1.458               | 0.6599–3.221 | 0.3266  |                       |              |         |
| Platelet count <sup>a</sup> ( $\leq 264 / > 264 \times 10^9 / L$ )     | 0.3876              | 0.1213–1.239 | 0.0229  | 0.256                 | 0.076–0.865  | 0.028   |
| NLR <sup>a</sup> ( $\leq 4.00 / > 4.00$ )                              | 0.4046              | 0.1552–1.055 | 0.0185  | 0.886                 | 0.212–3.693  | 0.868   |
| MLR <sup>a</sup> ( $\leq 0.42 / > 0.42$ )                              | 0.4471              | 0.1681–1.189 | 0.0409  | 0.554                 | 0.167–1.839  | 0.335   |
| PLR <sup>a</sup> ( $\leq 194.17 / > 194.17$ )                          | 0.3184              | 0.0817–1.241 | 0.0069  | 1.501                 | 0.268–8.426  | 0.644   |

<sup>a</sup>, the assessment of the optimal cutoff values were conducted by X-tile software. Abbreviations: EGFR, epidermal growth factor receptor; TKIs, tyrosine kinase inhibitors; PD-L1, programmed cell death ligand 1; PFS, progression-free survival; NLR, neutrophil-to-lymphocyte ratio; MLR, monocyte-to-lymphocyte ratio; PLR, platelet-to-lymphocyte ratio.
